# Supplementary material for: Increased trunk fat is associated with altered gene expression in breast tissue of normal weight women
Source: PubMed Central journal article supplement (PMC8795267; doi:10.1038/s41523-021-00369-8), 2022-01-27
Supplement: 41523_2021_369_MOESM1_ESM.pdf [file 41523_2021_369_MOESM1_ESM.pdf]

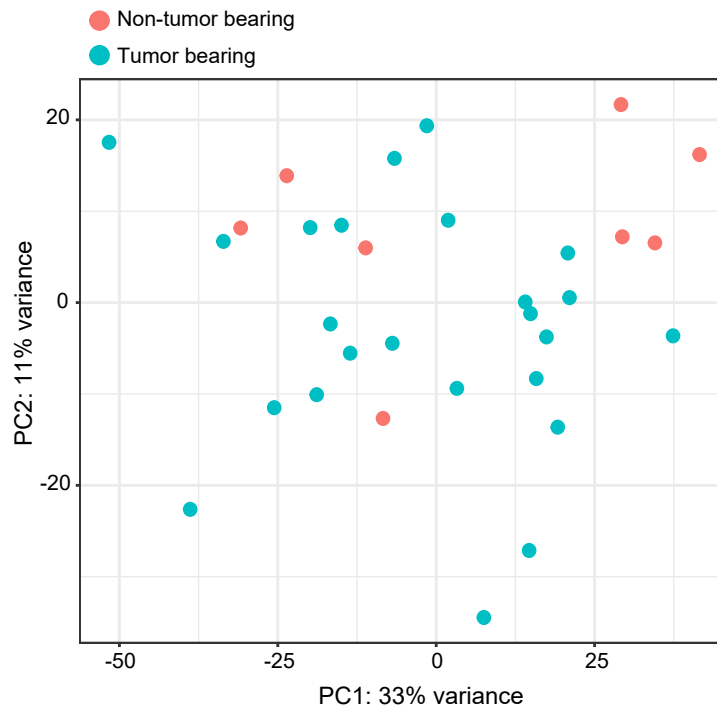

**Supplementary Figure 1.** Principal component analysis demonstrates that the presence of tumor had no effect on the transcriptome of non-tumorous breast tissue from an uninvolved quadrant of the breast. Non-tumor bearing and tumor bearing breast samples are well interspersed without distinctive clusters formed based on tumor status.

a.

Trunk Fat (%) vs. CLS status  
Up-DEGs

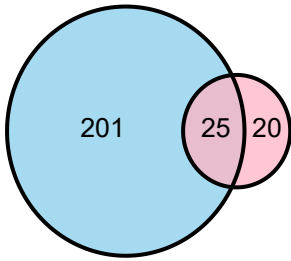

Trunk Fat (%) vs. Adipocyte size  
Up-DEGs

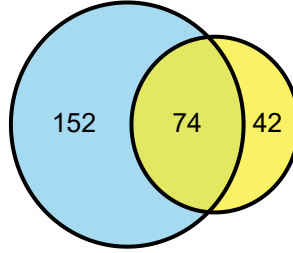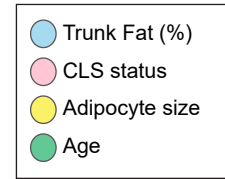

b.

Trunk Fat (%) vs. Age  
Dn-DEGs

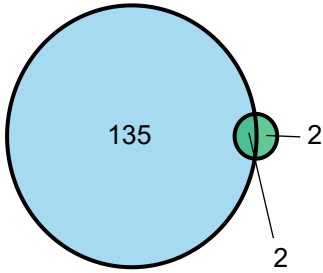

Trunk Fat (%) vs. CLS status  
Dn-DEGs

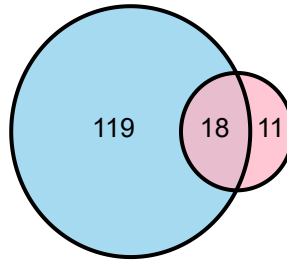

Trunk Fat (%) vs. Adipocyte size  
Dn-DEGs

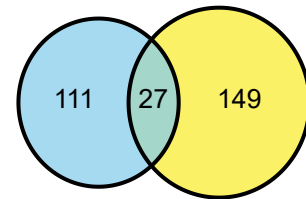

**Supplementary Figure 2.** Venn diagrams describing the number of overlapping DEGs. a. Up-regulated DEGs. b. Down-regulated DEGs.

Trunk fat Low Trunk fat High

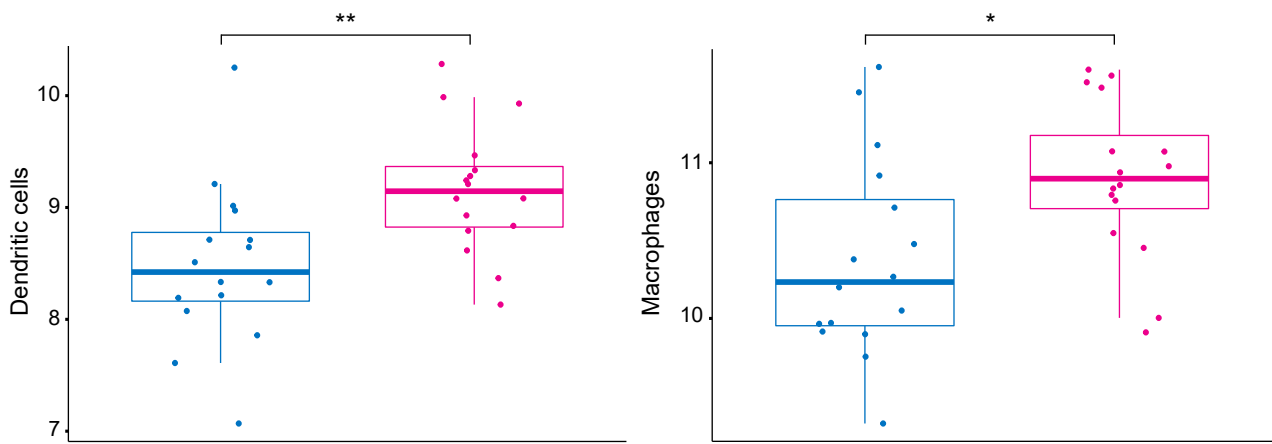

**Supplementary Figure 3.** Increased populations of dendritic cells and macrophages were found in association with high vs. low trunk fat in normal BMI women. This analysis was carried out based on the gene expression signatures of Danaher et al. \* $P < 0.05$ ; \*\* $P < 0.01$

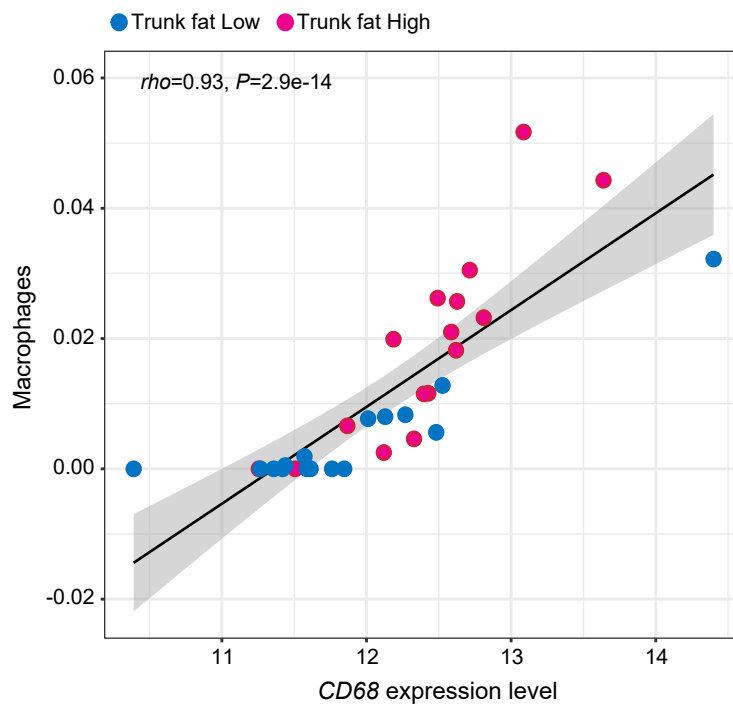

**Supplementary Figure 4.** Levels of *CD68*, a macrophage marker, correlate with the estimated macrophage population in breast white adipose tissue as determined by xCell.

Supplementary Table 1. Differentially expressed genes in trunk fat high vs. low.  
P.adj<0.05, |Log2FoldChange|>=0.6

| Gene                | DEG | Log2FoldChange | P.adj    |
|---------------------|-----|----------------|----------|
| <i>IL1RN</i>        | UP  | 2.03           | 2.01E-08 |
| <i>CSF3</i>         | UP  | 3.31           | 1.82E-05 |
| <i>UCHL1</i>        | UP  | 2.01           | 1.82E-05 |
| <i>HSPB8</i>        | UP  | 1.04           | 7.30E-05 |
| <i>HCST</i>         | UP  | 1.30           | 9.68E-05 |
| <i>LINC01852</i>    | UP  | 0.88           | 9.68E-05 |
| <i>PLAC9</i>        | UP  | 1.36           | 9.68E-05 |
| <i>SIGLEC7</i>      | UP  | 1.43           | 0.0002   |
| <i>ARHGDIG</i>      | UP  | 2.07           | 0.0002   |
| <i>TYROBP</i>       | UP  | 1.26           | 0.0002   |
| <i>DPT</i>          | UP  | 1.27           | 0.0002   |
| <i>CD83</i>         | UP  | 1.11           | 0.0002   |
| <i>LOC101929398</i> | UP  | 1.95           | 0.0002   |
| <i>NQO1</i>         | UP  | 1.23           | 0.0003   |
| <i>TREM1</i>        | UP  | 1.43           | 0.0003   |
| <i>SYNC</i>         | UP  | 1.07           | 0.0003   |
| <i>ANKDD1A</i>      | UP  | 1.17           | 0.0004   |
| <i>NLRP3</i>        | UP  | 1.10           | 0.0005   |
| <i>TIMP1</i>        | UP  | 0.87           | 0.0006   |
| <i>CRYBB1</i>       | UP  | 1.13           | 0.0007   |
| <i>CRYAB</i>        | UP  | 1.32           | 0.0007   |
| <i>HSD11B1</i>      | UP  | 1.14           | 0.0007   |
| <i>EPDR1</i>        | UP  | 0.83           | 0.0008   |
| <i>SPI1</i>         | UP  | 0.78           | 0.0008   |
| <i>IFITM3</i>       | UP  | 0.77           | 0.0011   |
| <i>CDA</i>          | UP  | 1.13           | 0.0013   |
| <i>DOK2</i>         | UP  | 1.03           | 0.0013   |
| <i>SRPX2</i>        | UP  | 0.90           | 0.0014   |
| <i>LOC107987423</i> | UP  | 1.39           | 0.0016   |
| <i>GNA15</i>        | UP  | 0.92           | 0.0017   |
| <i>ARPC1B</i>       | UP  | 0.65           | 0.0017   |
| <i>FCGR2A</i>       | UP  | 0.79           | 0.0018   |
| <i>CCL3</i>         | UP  | 1.58           | 0.0019   |
| <i>VMO1</i>         | UP  | 1.27           | 0.0019   |
| <i>HAS1</i>         | UP  | 2.26           | 0.0019   |
| <i>CPVL</i>         | UP  | 0.70           | 0.0020   |
| <i>FERMT3</i>       | UP  | 0.76           | 0.0020   |
| <i>WAS</i>          | UP  | 0.71           | 0.0020   |
| <i>CCND2</i>        | UP  | 0.70           | 0.0020   |
| <i>LEP</i>          | UP  | 0.98           | 0.0020   |
| <i>IL6</i>          | UP  | 2.18           | 0.0021   |
| <i>LOC105377918</i> | UP  | 1.35           | 0.0021   |

|                     |    |      |        |
|---------------------|----|------|--------|
| <i>CLEC2L</i>       | UP | 1.77 | 0.0022 |
| <i>LINC00968</i>    | UP | 1.65 | 0.0023 |
| <i>SLC14A2-AS1</i>  | UP | 1.53 | 0.0025 |
| <i>FPR3</i>         | UP | 0.88 | 0.0025 |
| <i>MYMX</i>         | UP | 1.19 | 0.0025 |
| <i>C11orf96</i>     | UP | 1.15 | 0.0026 |
| <i>LST1</i>         | UP | 1.01 | 0.0026 |
| <i>C1QA</i>         | UP | 1.09 | 0.0027 |
| <i>LOC102724850</i> | UP | 1.21 | 0.0027 |
| <i>IFITM1</i>       | UP | 0.61 | 0.0027 |
| <i>EMP3</i>         | UP | 0.74 | 0.0027 |
| <i>SAA1</i>         | UP | 1.55 | 0.0030 |
| <i>MSR1</i>         | UP | 0.88 | 0.0031 |
| <i>TNMD</i>         | UP | 0.98 | 0.0032 |
| <i>C1QB</i>         | UP | 1.02 | 0.0034 |
| <i>JUND</i>         | UP | 0.75 | 0.0035 |
| <i>VLDLR-AS1</i>    | UP | 1.95 | 0.0038 |
| <i>CD300C</i>       | UP | 0.95 | 0.0042 |
| <i>MYL9</i>         | UP | 0.89 | 0.0042 |
| <i>HMOX1</i>        | UP | 0.93 | 0.0043 |
| <i>CCN5</i>         | UP | 0.85 | 0.0045 |
| <i>UBE2D4</i>       | UP | 0.60 | 0.0045 |
| <i>PLA1A</i>        | UP | 1.01 | 0.0048 |
| <i>BAG3</i>         | UP | 0.82 | 0.0049 |
| <i>CCL18</i>        | UP | 1.88 | 0.0051 |
| <i>CXCL9</i>        | UP | 1.30 | 0.0051 |
| <i>METRNL</i>       | UP | 0.73 | 0.0051 |
| <i>PLAAT1</i>       | UP | 1.03 | 0.0051 |
| <i>IFITM2</i>       | UP | 0.65 | 0.0052 |
| <i>SH2D4A</i>       | UP | 0.65 | 0.0052 |
| <i>ACP5</i>         | UP | 1.13 | 0.0053 |
| <i>CYP4Z2P</i>      | UP | 1.26 | 0.0055 |
| <i>P2RX6</i>        | UP | 1.68 | 0.0059 |
| <i>C5orf64</i>      | UP | 1.04 | 0.0067 |
| <i>PARD6A</i>       | UP | 0.74 | 0.0067 |
| <i>SLC2A3</i>       | UP | 1.03 | 0.0067 |
| <i>VENTX</i>        | UP | 0.84 | 0.0067 |
| <i>GZMK</i>         | UP | 1.23 | 0.0069 |
| <i>C1QC</i>         | UP | 1.01 | 0.0070 |
| <i>CD151</i>        | UP | 0.77 | 0.0076 |
| <i>LCP1</i>         | UP | 0.60 | 0.0081 |
| <i>MMP19</i>        | UP | 0.81 | 0.0081 |
| <i>DUSP14</i>       | UP | 0.63 | 0.0082 |
| <i>SH3BGRL3</i>     | UP | 0.68 | 0.0082 |
| <i>LINC00294</i>    | UP | 0.72 | 0.0082 |
| <i>LGALS9</i>       | UP | 0.60 | 0.0087 |
| <i>HS3ST2</i>       | UP | 1.34 | 0.0091 |

|                     |    |      |        |
|---------------------|----|------|--------|
| <i>HTRA1</i>        | UP | 0.68 | 0.0093 |
| <i>LINC00857</i>    | UP | 0.67 | 0.0096 |
| <i>CCL2</i>         | UP | 1.28 | 0.0100 |
| <i>RND1</i>         | UP | 1.41 | 0.0101 |
| <i>BTK</i>          | UP | 0.67 | 0.0104 |
| <i>IL18</i>         | UP | 0.75 | 0.0106 |
| <i>TAGLN</i>        | UP | 0.70 | 0.0108 |
| <i>FCGR1B</i>       | UP | 1.34 | 0.0109 |
| <i>CCDC3</i>        | UP | 1.40 | 0.0111 |
| <i>RHOXF1</i>       | UP | 1.08 | 0.0112 |
| <i>ADAMTS4</i>      | UP | 1.32 | 0.0118 |
| <i>CD86</i>         | UP | 0.83 | 0.0120 |
| <i>S100A10</i>      | UP | 0.74 | 0.0124 |
| <i>TMEM54</i>       | UP | 0.80 | 0.0140 |
| <i>BOLA2</i>        | UP | 0.66 | 0.0143 |
| <i>LOC105372270</i> | UP | 1.14 | 0.0154 |
| <i>SELE</i>         | UP | 2.09 | 0.0154 |
| <i>LOC101927243</i> | UP | 1.31 | 0.0157 |
| <i>GPSM3</i>        | UP | 0.64 | 0.0161 |
| <i>GASAL1</i>       | UP | 0.68 | 0.0174 |
| <i>IFI27L2</i>      | UP | 0.68 | 0.0175 |
| <i>SNORD140</i>     | UP | 2.61 | 0.0175 |
| <i>CH25H</i>        | UP | 1.30 | 0.0177 |
| <i>ELN</i>          | UP | 0.70 | 0.0177 |
| <i>TRDN</i>         | UP | 1.62 | 0.0177 |
| <i>AFF2</i>         | UP | 1.32 | 0.0181 |
| <i>EPB42</i>        | UP | 1.28 | 0.0181 |
| <i>ITGB1BP1</i>     | UP | 0.66 | 0.0181 |
| <i>LOC105374413</i> | UP | 0.67 | 0.0181 |
| <i>TMIGD3</i>       | UP | 0.86 | 0.0184 |
| <i>URAD</i>         | UP | 2.75 | 0.0184 |
| <i>BHMT2</i>        | UP | 0.76 | 0.0191 |
| <i>PEMT</i>         | UP | 0.79 | 0.0195 |
| <i>SCIN</i>         | UP | 1.23 | 0.0195 |
| <i>SAA2</i>         | UP | 1.49 | 0.0196 |
| <i>CASP4LP</i>      | UP | 0.63 | 0.0199 |
| <i>MS4A14</i>       | UP | 1.04 | 0.0206 |
| <i>FBLN1</i>        | UP | 0.62 | 0.0210 |
| <i>PLTP</i>         | UP | 0.68 | 0.0212 |
| <i>SLC15A3</i>      | UP | 0.62 | 0.0212 |
| <i>LOC105369488</i> | UP | 1.40 | 0.0213 |
| <i>PIM1</i>         | UP | 1.01 | 0.0213 |
| <i>RPP25</i>        | UP | 0.61 | 0.0213 |
| <i>ULK4</i>         | UP | 0.64 | 0.0213 |
| <i>LOC112267855</i> | UP | 0.93 | 0.0213 |
| <i>CD14</i>         | UP | 0.70 | 0.0217 |
| <i>JAML</i>         | UP | 0.83 | 0.0217 |

|                     |    |      |        |
|---------------------|----|------|--------|
| <i>CD1C</i>         | UP | 1.02 | 0.0220 |
| <i>VEGFC</i>        | UP | 0.62 | 0.0220 |
| <i>C1QTNF5</i>      | UP | 0.75 | 0.0226 |
| <i>GPRC5A</i>       | UP | 0.99 | 0.0226 |
| <i>C15orf65</i>     | UP | 0.63 | 0.0234 |
| <i>LHCGR</i>        | UP | 1.35 | 0.0236 |
| <i>PYCARD</i>       | UP | 0.68 | 0.0236 |
| <i>DNLZ</i>         | UP | 0.93 | 0.0238 |
| <i>PIR</i>          | UP | 0.65 | 0.0242 |
| <i>THEMIS2</i>      | UP | 0.73 | 0.0242 |
| <i>TMEM160</i>      | UP | 0.75 | 0.0242 |
| <i>FCGR1A</i>       | UP | 0.97 | 0.0242 |
| <i>FGF18</i>        | UP | 1.12 | 0.0242 |
| <i>KLHL30</i>       | UP | 1.17 | 0.0242 |
| <i>MXRA7</i>        | UP | 0.62 | 0.0243 |
| <i>CTSS</i>         | UP | 0.61 | 0.0247 |
| <i>CST3</i>         | UP | 0.77 | 0.0248 |
| <i>ISG15</i>        | UP | 0.86 | 0.0256 |
| <i>ADAP1</i>        | UP | 0.71 | 0.0265 |
| <i>CD52</i>         | UP | 1.20 | 0.0266 |
| <i>TNFSF14</i>      | UP | 0.73 | 0.0276 |
| <i>AIF1</i>         | UP | 0.83 | 0.0277 |
| <i>CLEC4G</i>       | UP | 1.28 | 0.0277 |
| <i>LOC389705</i>    | UP | 0.66 | 0.0285 |
| <i>CHIT1</i>        | UP | 1.85 | 0.0286 |
| <i>RAB32</i>        | UP | 0.71 | 0.0290 |
| <i>MYZAP</i>        | UP | 0.72 | 0.0292 |
| <i>PMEPA1</i>       | UP | 0.76 | 0.0292 |
| <i>C2CD4B</i>       | UP | 1.52 | 0.0297 |
| <i>RNF122</i>       | UP | 0.96 | 0.0297 |
| <i>BCL2A1</i>       | UP | 1.08 | 0.0298 |
| <i>FOLR2</i>        | UP | 0.85 | 0.0298 |
| <i>NPL</i>          | UP | 0.70 | 0.0302 |
| <i>ADCYAP1</i>      | UP | 1.75 | 0.0307 |
| <i>ZNF541</i>       | UP | 1.02 | 0.0307 |
| <i>LOC105378687</i> | UP | 0.63 | 0.0315 |
| <i>IL17D</i>        | UP | 0.67 | 0.0320 |
| <i>LINC01260</i>    | UP | 1.00 | 0.0322 |
| <i>SULT1A2</i>      | UP | 1.13 | 0.0333 |
| <i>ACOT7</i>        | UP | 0.61 | 0.0336 |
| <i>NCF2</i>         | UP | 0.62 | 0.0339 |
| <i>LOC101929638</i> | UP | 0.88 | 0.0342 |
| <i>HLA-DRA</i>      | UP | 0.64 | 0.0345 |
| <i>RENBP</i>        | UP | 0.72 | 0.0345 |
| <i>LINC01402</i>    | UP | 0.85 | 0.0347 |
| <i>RGS16</i>        | UP | 0.78 | 0.0347 |
| <i>TPSD1</i>        | UP | 1.56 | 0.0355 |



|                     |    |       |        |
|---------------------|----|-------|--------|
| <i>RASGRP4</i>      | UP | 0.65  | 0.0357 |
| <i>VLDLR</i>        | UP | 0.83  | 0.0368 |
| <i>ITGB2</i>        | UP | 0.67  | 0.0369 |
| <i>SLC51A</i>       | UP | 0.69  | 0.0373 |
| <i>C19orf38</i>     | UP | 0.93  | 0.0373 |
| <i>PROK1</i>        | UP | 1.56  | 0.0375 |
| <i>NPR3</i>         | UP | 1.12  | 0.0377 |
| <i>NRROS</i>        | UP | 0.61  | 0.0379 |
| <i>C1orf198</i>     | UP | 0.77  | 0.0390 |
| <i>PISD</i>         | UP | 0.63  | 0.0390 |
| <i>HLA-DPB1</i>     | UP | 0.72  | 0.0390 |
| <i>TLCD2</i>        | UP | 0.61  | 0.0399 |
| <i>CD300E</i>       | UP | 0.84  | 0.0407 |
| <i>GRB14</i>        | UP | 0.82  | 0.0407 |
| <i>RAB44</i>        | UP | 0.76  | 0.0407 |
| <i>EBI3</i>         | UP | 0.79  | 0.0417 |
| <i>KLHDC7A</i>      | UP | 1.69  | 0.0428 |
| <i>CD53</i>         | UP | 0.67  | 0.0429 |
| <i>GPR183</i>       | UP | 0.75  | 0.0429 |
| <i>PDLIM2</i>       | UP | 0.61  | 0.0429 |
| <i>SNHG26</i>       | UP | 0.89  | 0.0432 |
| <i>NCF1</i>         | UP | 0.68  | 0.0442 |
| <i>ZNF219</i>       | UP | 0.73  | 0.0442 |
| <i>CES1</i>         | UP | 0.90  | 0.0443 |
| <i>MIEN1</i>        | UP | 0.61  | 0.0443 |
| <i>BCYRN1</i>       | UP | 1.08  | 0.0446 |
| <i>HK3</i>          | UP | 0.81  | 0.0452 |
| <i>FAM180B</i>      | UP | 0.93  | 0.0464 |
| <i>LOC105375707</i> | UP | 0.78  | 0.0467 |
| <i>MIR22HG</i>      | UP | 0.61  | 0.0467 |
| <i>IGSF6</i>        | UP | 0.71  | 0.0468 |
| <i>SOCS3</i>        | UP | 1.11  | 0.0471 |
| <i>C1orf122</i>     | UP | 0.76  | 0.0472 |
| <i>AKR1C1</i>       | UP | 0.67  | 0.0473 |
| <i>IER3-AS1</i>     | UP | 1.60  | 0.0473 |
| <i>CFP</i>          | UP | 0.67  | 0.0488 |
| <i>FHL1</i>         | UP | 0.69  | 0.0488 |
| <i>PI16</i>         | UP | 0.93  | 0.0488 |
| <i>IGFBP6</i>       | UP | 0.63  | 0.0489 |
| <i>C3AR1</i>        | UP | 0.71  | 0.0492 |
| <i>HSPB2</i>        | UP | 0.69  | 0.0496 |
| <i>CFD</i>          | UP | 0.72  | 0.0497 |
| <i>NTNG1</i>        | UP | 0.97  | 0.0498 |
| <i>CSN2</i>         | DN | -9.40 | 0.0000 |
| <i>LALBA</i>        | DN | -7.74 | 0.0000 |
| <i>LOC102723566</i> | DN | -0.92 | 0.0000 |
| <i>BTN1A1</i>       | DN | -4.23 | 0.0000 |

|                     |    |       |        |
|---------------------|----|-------|--------|
| <i>LOC105375012</i> | DN | -3.35 | 0.0000 |
| <i>CSN3</i>         | DN | -6.62 | 0.0000 |
| <i>XDH</i>          | DN | -2.49 | 0.0001 |
| <i>BRIP1</i>        | DN | -0.98 | 0.0001 |
| <i>CHIA</i>         | DN | -3.68 | 0.0001 |
| <i>SLC28A3</i>      | DN | -3.20 | 0.0007 |
| <i>C6</i>           | DN | -1.71 | 0.0007 |
| <i>LOC107985388</i> | DN | -0.89 | 0.0020 |
| <i>PKP2</i>         | DN | -1.05 | 0.0021 |
| <i>MGAM2</i>        | DN | -2.31 | 0.0021 |
| <i>ALK</i>          | DN | -1.27 | 0.0022 |
| <i>PI3</i>          | DN | -2.31 | 0.0025 |
| <i>SEMA4G</i>       | DN | -0.60 | 0.0036 |
| <i>SLC16A10</i>     | DN | -0.64 | 0.0037 |
| <i>SLCO1C1</i>      | DN | -1.05 | 0.0045 |
| <i>TTC36</i>        | DN | -1.34 | 0.0048 |
| <i>LOC107987152</i> | DN | -0.96 | 0.0050 |
| <i>MAMDC4</i>       | DN | -1.50 | 0.0052 |
| <i>MEF2B</i>        | DN | -1.68 | 0.0052 |
| <i>PEX5L</i>        | DN | -0.99 | 0.0054 |
| <i>MOGAT1</i>       | DN | -1.29 | 0.0057 |
| <i>LTF</i>          | DN | -2.00 | 0.0059 |
| <i>GFAP</i>         | DN | -1.04 | 0.0067 |
| <i>LOC105378577</i> | DN | -2.00 | 0.0070 |
| <i>ABCG8</i>        | DN | -0.71 | 0.0071 |
| <i>MUC5B</i>        | DN | -2.13 | 0.0082 |
| <i>GCK</i>          | DN | -1.28 | 0.0091 |
| <i>TOX3</i>         | DN | -1.53 | 0.0091 |
| <i>AMN</i>          | DN | -1.67 | 0.0098 |
| <i>OBSCN</i>        | DN | -0.93 | 0.0098 |
| <i>CLCA4</i>        | DN | -2.40 | 0.0099 |
| <i>FGF7P3</i>       | DN | -0.81 | 0.0114 |
| <i>LINC02076</i>    | DN | -0.93 | 0.0115 |
| <i>ATP2B2</i>       | DN | -1.43 | 0.0116 |
| <i>KIF19</i>        | DN | -1.27 | 0.0124 |
| <i>TMEM9B-AS1</i>   | DN | -0.76 | 0.0125 |
| <i>SSPOP</i>        | DN | -0.93 | 0.0126 |
| <i>LOC101927300</i> | DN | -0.63 | 0.0134 |
| <i>PKIA</i>         | DN | -0.66 | 0.0140 |
| <i>ZNF334</i>       | DN | -0.93 | 0.0140 |
| <i>SLC16A8</i>      | DN | -0.92 | 0.0156 |
| <i>CECR2</i>        | DN | -0.94 | 0.0157 |
| <i>LTB4R2</i>       | DN | -0.62 | 0.0159 |
| <i>CA3</i>          | DN | -1.51 | 0.0161 |
| <i>CSPG5</i>        | DN | -0.88 | 0.0169 |
| <i>MYBL2</i>        | DN | -0.92 | 0.0169 |
| <i>BBOX1</i>        | DN | -1.59 | 0.0172 |

|                     |    |       |        |
|---------------------|----|-------|--------|
| <i>LOC102723648</i> | DN | -0.82 | 0.0173 |
| <i>GLYCTK</i>       | DN | -1.12 | 0.0174 |
| <i>LOC105378561</i> | DN | -0.73 | 0.0177 |
| <i>LOC107984836</i> | DN | -0.91 | 0.0191 |
| <i>C19orf57</i>     | DN | -0.78 | 0.0192 |
| <i>LINC01235</i>    | DN | -1.91 | 0.0195 |
| <i>LOC101927401</i> | DN | -1.19 | 0.0199 |
| <i>ALG1L</i>        | DN | -0.61 | 0.0202 |
| <i>TBATA</i>        | DN | -1.98 | 0.0208 |
| <i>LOC105373903</i> | DN | -1.09 | 0.0209 |
| <i>COL27A1</i>      | DN | -0.92 | 0.0213 |
| <i>CTSV</i>         | DN | -1.26 | 0.0213 |
| <i>LOC105372431</i> | DN | -0.90 | 0.0213 |
| <i>LPIN1</i>        | DN | -0.77 | 0.0213 |
| <i>TIAM2</i>        | DN | -0.95 | 0.0213 |
| <i>SLC34A2</i>      | DN | -1.97 | 0.0218 |
| <i>DNHD1</i>        | DN | -0.63 | 0.0220 |
| <i>PLEKHS1</i>      | DN | -1.87 | 0.0220 |
| <i>PRRT4</i>        | DN | -1.09 | 0.0220 |
| <i>CDT1</i>         | DN | -1.24 | 0.0222 |
| <i>PEG10</i>        | DN | -1.13 | 0.0236 |
| <i>RAB26</i>        | DN | -1.13 | 0.0246 |
| <i>RP1L1</i>        | DN | -1.07 | 0.0246 |
| <i>SHROOM2</i>      | DN | -0.86 | 0.0246 |
| <i>ANKRD20A8P</i>   | DN | -1.32 | 0.0247 |
| <i>SLC9A3</i>       | DN | -0.61 | 0.0255 |
| <i>ABCG5</i>        | DN | -0.74 | 0.0259 |
| <i>LOC107986785</i> | DN | -0.85 | 0.0259 |
| <i>LOC727978</i>    | DN | -0.93 | 0.0259 |
| <i>NRAD1</i>        | DN | -1.46 | 0.0259 |
| <i>KIF20A</i>       | DN | -1.23 | 0.0261 |
| <i>LOC105374473</i> | DN | -1.01 | 0.0266 |
| <i>LOC105369201</i> | DN | -1.33 | 0.0269 |
| <i>FAM161A</i>      | DN | -0.64 | 0.0271 |
| <i>PCP4L1</i>       | DN | -1.04 | 0.0279 |
| <i>EPCAM-DT</i>     | DN | -1.04 | 0.0283 |
| <i>B3GAT1</i>       | DN | -1.42 | 0.0287 |
| <i>KLHL32</i>       | DN | -0.85 | 0.0298 |
| <i>PDZD7</i>        | DN | -0.98 | 0.0309 |
| <i>GLUD1P3</i>      | DN | -0.63 | 0.0314 |
| <i>AZGP1P1</i>      | DN | -1.23 | 0.0317 |
| <i>LOC101927088</i> | DN | -0.83 | 0.0317 |
| <i>ANKRD24</i>      | DN | -0.68 | 0.0322 |
| <i>MUC16</i>        | DN | -1.45 | 0.0328 |
| <i>FABP7</i>        | DN | -2.19 | 0.0328 |
| <i>FASN</i>         | DN | -1.19 | 0.0329 |
| <i>EYA1</i>         | DN | -0.88 | 0.0333 |

|                         |    |       |        |
|-------------------------|----|-------|--------|
| <i>LOC105373027</i>     | DN | -1.41 | 0.0333 |
| <i>KRT80</i>            | DN | -1.79 | 0.0337 |
| <i>MRPL23-AS1</i>       | DN | -0.99 | 0.0341 |
| <i>PTCHD1</i>           | DN | -1.49 | 0.0345 |
| <i>TCN1</i>             | DN | -1.90 | 0.0355 |
| <i>ANKK1</i>            | DN | -0.66 | 0.0365 |
| <i>PWARSN</i>           | DN | -0.66 | 0.0368 |
| <i>GOLGA6L9</i>         | DN | -0.81 | 0.0369 |
| <i>PPP1R14C</i>         | DN | -1.47 | 0.0372 |
| <i>NPC1L1</i>           | DN | -1.01 | 0.0382 |
| <i>KCNS1</i>            | DN | -1.85 | 0.0390 |
| <i>KCTD14</i>           | DN | -1.34 | 0.0390 |
| <i>LOC107985939</i>     | DN | -0.74 | 0.0390 |
| <i>LRIG1</i>            | DN | -0.71 | 0.0390 |
| <i>ANTXRL</i>           | DN | -1.66 | 0.0394 |
| <i>SCNN1G</i>           | DN | -1.43 | 0.0395 |
| <i>CEL</i>              | DN | -1.12 | 0.0402 |
| <i>RIMBP2</i>           | DN | -0.96 | 0.0421 |
| <i>SMIM17</i>           | DN | -1.84 | 0.0428 |
| <i>HELLS</i>            | DN | -0.94 | 0.0429 |
| <i>PRR7</i>             | DN | -1.09 | 0.0429 |
| <i>SPTB</i>             | DN | -1.01 | 0.0429 |
| <i>LOC101927751</i>     | DN | -1.11 | 0.0434 |
| <i>CSN1S2AP</i>         | DN | -9.53 | 0.0442 |
| <i>TSPY26P</i>          | DN | -0.81 | 0.0442 |
| <i>ESPL1</i>            | DN | -0.98 | 0.0443 |
| <i>MAGED4</i>           | DN | -0.81 | 0.0452 |
| <i>LOC105371692</i>     | DN | -0.75 | 0.0454 |
| <i>LOC105371505</i>     | DN | -0.89 | 0.0461 |
| <i>LOC112268187</i>     | DN | -1.34 | 0.0464 |
| <i>LINC00680-GUSBP4</i> | DN | -0.85 | 0.0468 |
| <i>ADIPOQ-AS1</i>       | DN | -1.25 | 0.0473 |
| <i>LOC112268021</i>     | DN | -0.82 | 0.0473 |
| <i>ACSM2B</i>           | DN | -0.84 | 0.0479 |
| <i>TROAP</i>            | DN | -1.07 | 0.0485 |
| <i>INTS4P2</i>          | DN | -1.81 | 0.0488 |
| <i>RASD2</i>            | DN | -0.93 | 0.0491 |
| <i>UHRF1</i>            | DN | -0.94 | 0.0494 |
| <i>FAM166B</i>          | DN | -0.86 | 0.0496 |

---

Supplementary Table 2. Differentially expressed genes for age $\geq$  45 vs. age $<$ 45 years.  
P.adj $<$ 0.05, |Log2FoldChange| $\geq$ 0.6

| Gene             | DEG | Overlapped with<br>High vs. Low Trunk Fat | Log2FoldChange | P.adj    |
|------------------|-----|-------------------------------------------|----------------|----------|
| <i>DHRS2</i>     | UP  | No overlap                                | 2.03           | 0.029804 |
| <i>CSN2</i>      | DN  | Overlapped                                | -6.92          | 0.029804 |
| <i>LALBA</i>     | DN  | Overlapped                                | -5.67          | 0.029804 |
| <i>LINC00639</i> | DN  | No overlap                                | -0.79          | 0.029804 |



Supplementary Table 3. Differentially expressed genes in post- vs. premenopausal women.  
 $P_{adj} < 0.05$ ,  $|\text{Log}_2\text{FoldChange}| \geq 0.6$

| Gene                | DEG | Overlapped with<br>High vs. Low Trunk Fat | Log2FoldChange | P.adj    |
|---------------------|-----|-------------------------------------------|----------------|----------|
| <i>LOC107984247</i> | UP  | No overlap                                | 7.69           | 0.005367 |
| <i>LOC105372884</i> | UP  | No overlap                                | 0.82           | 0.022463 |
| <i>RCAN2</i>        | UP  | No overlap                                | 1.26           | 0.035198 |
| <i>SLC16A9</i>      | DN  | No overlap                                | -2.61          | 0.000003 |
| <i>TFF1</i>         | DN  | No overlap                                | -5.25          | 0.001846 |
| <i>GREB1</i>        | DN  | No overlap                                | -1.77          | 0.005367 |
| <i>LOC105379521</i> | DN  | No overlap                                | -2.06          | 0.005367 |
| <i>SCGB3A1</i>      | DN  | No overlap                                | -4.48          | 0.006377 |
| <i>GLRA3</i>        | DN  | No overlap                                | -3.04          | 0.018312 |
| <i>LINC01139</i>    | DN  | No overlap                                | -3.03          | 0.033351 |
| <i>LINC01087</i>    | DN  | No overlap                                | -3.64          | 0.041224 |
| <i>TUBA3D</i>       | DN  | No overlap                                | -2.09          | 0.041224 |

Supplementary Table 4. Differentially expressed genes for CLS(+) vs. CLS(-).  
P.adj<0.05, |Log2FoldChange|>=0.6

| Gene                    | DEG | Overlapped with<br>High vs. Low Trunk Fat | Log2FoldChange | P.adj       |
|-------------------------|-----|-------------------------------------------|----------------|-------------|
| <i>UPK1A</i>            | UP  | No overlap                                | 2.21           | 0.000251294 |
| <i>ACP5</i>             | UP  | Overlapped                                | 1.37           | 0.000727725 |
| <i>CCL18</i>            | UP  | Overlapped                                | 2.24           | 0.001355663 |
| <i>RPP25</i>            | UP  | Overlapped                                | 0.77           | 0.007356342 |
| <i>VLDLR-AS1</i>        | UP  | Overlapped                                | 2.14           | 0.007922787 |
| <i>CCN5</i>             | UP  | Overlapped                                | 0.94           | 0.008988897 |
| <i>DPT</i>              | UP  | Overlapped                                | 1.22           | 0.008988897 |
| <i>IQCD</i>             | UP  | No overlap                                | 0.66           | 0.008988897 |
| <i>CHIT1</i>            | UP  | Overlapped                                | 2.34           | 0.009641139 |
| <i>TMIGD3</i>           | UP  | Overlapped                                | 1.01           | 0.016480607 |
| <i>ATP6V0D2</i>         | UP  | No overlap                                | 1.35           | 0.019248135 |
| <i>LINC02227</i>        | UP  | No overlap                                | 1.54           | 0.020926916 |
| <i>SNORD140</i>         | UP  | Overlapped                                | 2.95           | 0.020926916 |
| <i>LL22NC03-104C7.1</i> | UP  | No overlap                                | 0.85           | 0.02124364  |
| <i>LOC105374413</i>     | UP  | Overlapped                                | 0.76           | 0.024222978 |
| <i>HS3ST2</i>           | UP  | Overlapped                                | 1.44           | 0.024900316 |
| <i>IL18</i>             | UP  | Overlapped                                | 0.81           | 0.027290226 |
| <i>ITGB1BP1</i>         | UP  | Overlapped                                | 0.75           | 0.027590712 |
| <i>SRPX2</i>            | UP  | Overlapped                                | 0.88           | 0.027590712 |
| <i>GFRAL</i>            | UP  | No overlap                                | 1.07           | 0.028219215 |
| <i>PLA2G7</i>           | UP  | No overlap                                | 1.31           | 0.031911888 |
| <i>ZBED5-AS1</i>        | UP  | No overlap                                | 0.67           | 0.032686129 |
| <i>LOC105374657</i>     | UP  | No overlap                                | 2.04           | 0.034716876 |
| <i>PRDX4</i>            | UP  | No overlap                                | 0.65           | 0.034716876 |
| <i>TXN</i>              | UP  | No overlap                                | 0.64           | 0.034716876 |
| <i>LINC01852</i>        | UP  | Overlapped                                | 0.76           | 0.034942895 |
| <i>BOLA2</i>            | UP  | Overlapped                                | 0.71           | 0.035130342 |
| <i>CASP4LP</i>          | UP  | Overlapped                                | 0.70           | 0.037165709 |
| <i>DOK2</i>             | UP  | Overlapped                                | 0.95           | 0.037165709 |
| <i>LOC101927243</i>     | UP  | Overlapped                                | 1.37           | 0.039003386 |
| <i>TNMD</i>             | UP  | Overlapped                                | 0.95           | 0.039003386 |
| <i>GGTA1P</i>           | UP  | No overlap                                | 0.64           | 0.039086782 |
| <i>RAB32</i>            | UP  | Overlapped                                | 0.81           | 0.039086782 |
| <i>UCHL1</i>            | UP  | Overlapped                                | 1.59           | 0.040036356 |
| <i>LOC105373334</i>     | UP  | No overlap                                | 0.92           | 0.046658069 |
| <i>MSTO1</i>            | UP  | No overlap                                | 0.71           | 0.046658069 |
| <i>FTH1</i>             | UP  | No overlap                                | 0.73           | 0.047321604 |
| <i>FTH1P3</i>           | UP  | No overlap                                | 0.85           | 0.047321604 |
| <i>HSD11B1-AS1</i>      | UP  | No overlap                                | 0.97           | 0.047321604 |
| <i>PLAAT1</i>           | UP  | Overlapped                                | 1.00           | 0.047321604 |
| <i>C15orf65</i>         | UP  | Overlapped                                | 0.68           | 0.048176156 |



|                     |    |            |        |             |
|---------------------|----|------------|--------|-------------|
| <i>CCDC13</i>       | UP | No overlap | 0.68   | 0.049049103 |
| <i>GNA15</i>        | UP | Overlapped | 0.84   | 0.049049103 |
| <i>NPC2</i>         | UP | No overlap | 0.63   | 0.049049103 |
| <i>LOC101929645</i> | UP | No overlap | 0.63   | 0.049268263 |
| <i>CSN1S2AP</i>     | DN | Overlapped | -22.87 | 1.31E-08    |
| <i>LALBA</i>        | DN | Overlapped | -7.76  | 0.000105711 |
| <i>CSN2</i>         | DN | Overlapped | -8.79  | 0.000251294 |
| <i>PIGR</i>         | DN | No overlap | -3.24  | 0.007922787 |
| <i>BTN1A1</i>       | DN | Overlapped | -3.91  | 0.00858592  |
| <i>CSN3</i>         | DN | Overlapped | -6.06  | 0.019248135 |
| <i>TBATA</i>        | DN | Overlapped | -2.48  | 0.020569288 |
| <i>SHISA6</i>       | DN | No overlap | -0.95  | 0.024222978 |
| <i>LPIN1</i>        | DN | Overlapped | -0.92  | 0.026478841 |
| <i>MMS22L</i>       | DN | No overlap | -0.67  | 0.026478841 |
| <i>CDCA7</i>        | DN | No overlap | -1.37  | 0.032686129 |
| <i>MRPL23-AS1</i>   | DN | Overlapped | -1.26  | 0.033600066 |
| <i>LOC105371505</i> | DN | Overlapped | -1.16  | 0.033863564 |
| <i>APOL4</i>        | DN | No overlap | -1.43  | 0.034716876 |
| <i>LOC105373903</i> | DN | Overlapped | -1.29  | 0.034716876 |
| <i>PRDM1</i>        | DN | No overlap | -0.74  | 0.034716876 |
| <i>SLCO1C1</i>      | DN | Overlapped | -1.08  | 0.034817576 |
| <i>LOC102723566</i> | DN | Overlapped | -0.75  | 0.038639229 |
| <i>MUC5B</i>        | DN | Overlapped | -2.27  | 0.038639229 |
| <i>ZNF334</i>       | DN | Overlapped | -1.01  | 0.039035293 |
| <i>CHRNA7</i>       | DN | No overlap | -1.30  | 0.039086782 |
| <i>CTH</i>          | DN | No overlap | -0.73  | 0.039086782 |
| <i>LINC02656</i>    | DN | No overlap | -0.89  | 0.039342033 |
| <i>ANKRD20A8P</i>   | DN | Overlapped | -1.53  | 0.041604506 |
| <i>BMP3</i>         | DN | No overlap | -1.92  | 0.041604506 |
| <i>GPR137C</i>      | DN | No overlap | -0.83  | 0.041604506 |
| <i>C6</i>           | DN | Overlapped | -1.53  | 0.047367673 |
| <i>PRRT4</i>        | DN | Overlapped | -1.20  | 0.049049103 |
| <i>MAMDC4</i>       | DN | Overlapped | -1.48  | 0.049268263 |

---

Supplementary Table 5. Differentially expressed genes in large vs. small adipocytes.  
P.adj<0.05, |Log2FoldChange|>=0.6

| Gene                | DEG | Overlapped with<br>High vs. Low Trunk Fat | Log2FoldChange | P.adj       |
|---------------------|-----|-------------------------------------------|----------------|-------------|
| <i>EPB42</i>        | UP  | Overlapped                                | 1.75           | 3.93E-05    |
| <i>LOC101929398</i> | UP  | Overlapped                                | 2.00           | 0.00048954  |
| <i>LINC00968</i>    | UP  | Overlapped                                | 1.85           | 0.000603474 |
| <i>SCIN</i>         | UP  | Overlapped                                | 1.55           | 0.001156601 |
| <i>UCHL1</i>        | UP  | Overlapped                                | 1.86           | 0.001156601 |
| <i>CCDC3</i>        | UP  | Overlapped                                | 1.67           | 0.001211335 |
| <i>SLC14A2-AS1</i>  | UP  | Overlapped                                | 1.67           | 0.001211335 |
| <i>PLA1A</i>        | UP  | Overlapped                                | 1.12           | 0.00132494  |
| <i>ULK4</i>         | UP  | Overlapped                                | 0.78           | 0.00132494  |
| <i>AFF2</i>         | UP  | Overlapped                                | 1.62           | 0.001596947 |
| <i>LOC105377982</i> | UP  | No overlap                                | 1.45           | 0.00281547  |
| <i>EPDR1</i>        | UP  | Overlapped                                | 0.82           | 0.002847942 |
| <i>NRCAM</i>        | UP  | No overlap                                | 1.95           | 0.002847942 |
| <i>LINC01852</i>    | UP  | Overlapped                                | 0.81           | 0.003231738 |
| <i>VLDLR-AS1</i>    | UP  | Overlapped                                | 2.07           | 0.00327304  |
| <i>C4orf19</i>      | UP  | No overlap                                | 0.62           | 0.003554836 |
| <i>TNFRSF10D</i>    | UP  | No overlap                                | 0.95           | 0.003606475 |
| <i>FHL1</i>         | UP  | Overlapped                                | 0.88           | 0.003747747 |
| <i>SAA1</i>         | UP  | Overlapped                                | 1.60           | 0.003747747 |
| <i>BMP2</i>         | UP  | No overlap                                | 0.87           | 0.004121004 |
| <i>MMP19</i>        | UP  | Overlapped                                | 0.88           | 0.004121004 |
| <i>MYMX</i>         | UP  | Overlapped                                | 1.21           | 0.004481529 |
| <i>LEP</i>          | UP  | Overlapped                                | 0.98           | 0.004609544 |
| <i>VLDLR</i>        | UP  | Overlapped                                | 1.03           | 0.004609544 |
| <i>HSPB8</i>        | UP  | Overlapped                                | 0.92           | 0.00495356  |
| <i>SYNC</i>         | UP  | Overlapped                                | 0.97           | 0.006621705 |
| <i>ARHGDI3</i>      | UP  | Overlapped                                | 1.83           | 0.006846737 |
| <i>SRPX2</i>        | UP  | Overlapped                                | 0.87           | 0.006846737 |
| <i>DZIP1L</i>       | UP  | No overlap                                | 0.61           | 0.007102318 |
| <i>MYZAP</i>        | UP  | Overlapped                                | 0.84           | 0.007470579 |
| <i>LYZ</i>          | UP  | No overlap                                | 1.44           | 0.008020398 |
| <i>LOC105376486</i> | UP  | No overlap                                | 0.77           | 0.008411787 |
| <i>NQO1</i>         | UP  | Overlapped                                | 1.10           | 0.00877626  |
| <i>RHOXF1</i>       | UP  | Overlapped                                | 1.15           | 0.00877626  |
| <i>HSD11B1</i>      | UP  | Overlapped                                | 1.04           | 0.00907245  |
| <i>HOXC8</i>        | UP  | No overlap                                | 0.74           | 0.009694005 |
| <i>GFRAL</i>        | UP  | No overlap                                | 1.06           | 0.009995821 |
| <i>TRDN</i>         | UP  | Overlapped                                | 1.77           | 0.009995821 |
| <i>UPK1A</i>        | UP  | No overlap                                | 1.81           | 0.009995821 |
| <i>LOC107985524</i> | UP  | No overlap                                | 0.80           | 0.010203662 |
| <i>MSR1</i>         | UP  | Overlapped                                | 0.85           | 0.0106403   |

|                     |    |            |      |             |
|---------------------|----|------------|------|-------------|
| <i>LOC105377918</i> | UP | Overlapped | 1.28 | 0.010912143 |
| <i>ANKRD33B</i>     | UP | No overlap | 0.97 | 0.011552178 |
| <i>DCUN1D3</i>      | UP | No overlap | 0.62 | 0.011552178 |
| <i>PIR</i>          | UP | Overlapped | 0.72 | 0.011701    |
| <i>BAG3</i>         | UP | Overlapped | 0.81 | 0.011995574 |
| <i>TREM1</i>        | UP | Overlapped | 1.23 | 0.011995574 |
| <i>NLRP3</i>        | UP | Overlapped | 0.96 | 0.012694626 |
| <i>CSF3</i>         | UP | Overlapped | 2.63 | 0.01359005  |
| <i>SELE</i>         | UP | Overlapped | 2.20 | 0.01359005  |
| <i>LOC107987423</i> | UP | Overlapped | 1.26 | 0.013602757 |
| <i>SLC25A25</i>     | UP | No overlap | 0.86 | 0.014003154 |
| <i>TNMD</i>         | UP | Overlapped | 0.92 | 0.015506415 |
| <i>HS3ST2</i>       | UP | Overlapped | 1.34 | 0.015543886 |
| <i>LOC105378685</i> | UP | No overlap | 0.95 | 0.016873594 |
| <i>STX11</i>        | UP | No overlap | 0.64 | 0.017372013 |
| <i>LINC01402</i>    | UP | Overlapped | 0.95 | 0.017686376 |
| <i>LOC105378915</i> | UP | No overlap | 1.06 | 0.019179403 |
| <i>PCLO</i>         | UP | No overlap | 1.02 | 0.019179403 |
| <i>BHMT2</i>        | UP | Overlapped | 0.79 | 0.019429999 |
| <i>LOC105373202</i> | UP | No overlap | 1.43 | 0.019436683 |
| <i>VENTX</i>        | UP | Overlapped | 0.81 | 0.020262138 |
| <i>LOC100506178</i> | UP | No overlap | 0.98 | 0.020598872 |
| <i>LOC105372270</i> | UP | Overlapped | 1.15 | 0.020598872 |
| <i>SAA2</i>         | UP | Overlapped | 1.54 | 0.020598872 |
| <i>TLCD2</i>        | UP | Overlapped | 0.68 | 0.020598872 |
| <i>SLC2A3</i>       | UP | Overlapped | 0.99 | 0.021041132 |
| <i>LOC105374166</i> | UP | No overlap | 1.40 | 0.021632068 |
| <i>DOK2</i>         | UP | Overlapped | 0.89 | 0.022439888 |
| <i>GZMK</i>         | UP | Overlapped | 1.17 | 0.022439888 |
| <i>RGS20</i>        | UP | No overlap | 1.06 | 0.022439888 |
| <i>LOC105374127</i> | UP | No overlap | 1.06 | 0.022687485 |
| <i>PROK1</i>        | UP | Overlapped | 1.72 | 0.022989648 |
| <i>ITSN1</i>        | UP | No overlap | 0.61 | 0.023771542 |
| <i>CRYAB</i>        | UP | Overlapped | 1.10 | 0.024551553 |
| <i>GRB14</i>        | UP | Overlapped | 0.89 | 0.024620897 |
| <i>HSPA12A</i>      | UP | No overlap | 0.85 | 0.025683373 |
| <i>LINC00857</i>    | UP | Overlapped | 0.64 | 0.025683373 |
| <i>METRNL</i>       | UP | Overlapped | 0.68 | 0.025683373 |
| <i>COL8A1</i>       | UP | No overlap | 1.14 | 0.025789931 |
| <i>SH2D4A</i>       | UP | Overlapped | 0.60 | 0.025841092 |
| <i>LOC101927243</i> | UP | Overlapped | 1.29 | 0.026055084 |
| <i>TNFSF14</i>      | UP | Overlapped | 0.76 | 0.026055084 |
| <i>DPT</i>          | UP | Overlapped | 1.01 | 0.026410262 |
| <i>WDPCP</i>        | UP | No overlap | 0.69 | 0.02683696  |
| <i>NECAB1</i>       | UP | No overlap | 0.93 | 0.027173205 |
| <i>CCL3</i>         | UP | Overlapped | 1.33 | 0.031057866 |
| <i>MIR22HG</i>      | UP | Overlapped | 0.67 | 0.031790483 |

|                     |    |            |       |             |
|---------------------|----|------------|-------|-------------|
| <i>CHST3</i>        | UP | No overlap | 0.65  | 0.031830723 |
| <i>NRP2</i>         | UP | No overlap | 0.70  | 0.032458335 |
| <i>PMEPA1</i>       | UP | Overlapped | 0.78  | 0.03485418  |
| <i>EGFL6</i>        | UP | No overlap | 2.54  | 0.036363136 |
| <i>HAS1</i>         | UP | Overlapped | 1.86  | 0.036363136 |
| <i>NPR3</i>         | UP | Overlapped | 1.17  | 0.036764165 |
| <i>PTPRQ</i>        | UP | No overlap | 0.95  | 0.036764165 |
| <i>RNF122</i>       | UP | Overlapped | 0.98  | 0.036764165 |
| <i>C19orf38</i>     | UP | Overlapped | 0.97  | 0.037751557 |
| <i>PYGL</i>         | UP | No overlap | 0.63  | 0.037751557 |
| <i>LINC00891</i>    | UP | No overlap | 0.72  | 0.040569439 |
| <i>LOC100132741</i> | UP | No overlap | 0.72  | 0.040569439 |
| <i>ARHGEF39</i>     | UP | No overlap | 0.60  | 0.0409044   |
| <i>ID4</i>          | UP | No overlap | 0.70  | 0.041142481 |
| <i>LOC107984952</i> | UP | No overlap | 0.83  | 0.04420987  |
| <i>FGF18</i>        | UP | Overlapped | 1.09  | 0.044338161 |
| <i>URAD</i>         | UP | Overlapped | 2.60  | 0.044338161 |
| <i>ANKDD1A</i>      | UP | Overlapped | 0.90  | 0.04489705  |
| <i>FERMT3</i>       | UP | Overlapped | 0.63  | 0.046002361 |
| <i>GLYAT</i>        | UP | No overlap | 0.75  | 0.046002361 |
| <i>LOC102724850</i> | UP | Overlapped | 1.00  | 0.046002361 |
| <i>LOC105374657</i> | UP | No overlap | 1.74  | 0.046002361 |
| <i>HMOX1</i>        | UP | Overlapped | 0.80  | 0.046420871 |
| <i>MYL9</i>         | UP | Overlapped | 0.76  | 0.04652077  |
| <i>CD209</i>        | UP | No overlap | 0.76  | 0.046951076 |
| <i>FCGR2A</i>       | UP | Overlapped | 0.64  | 0.048017337 |
| <i>C5orf64</i>      | UP | Overlapped | 0.91  | 0.048407326 |
| <i>IL6</i>          | UP | Overlapped | 1.75  | 0.049169961 |
| <i>RAB26</i>        | DN | Overlapped | -1.98 | 0.000601018 |
| <i>DEGS2</i>        | DN | No overlap | -1.88 | 0.00132494  |
| <i>TMEM25</i>       | DN | No overlap | -0.74 | 0.001596947 |
| <i>GRIK3</i>        | DN | No overlap | -1.82 | 0.001777693 |
| <i>TOX3</i>         | DN | Overlapped | -1.75 | 0.001777693 |
| <i>SALL2</i>        | DN | No overlap | -0.73 | 0.002164853 |
| <i>TOP2A</i>        | DN | No overlap | -1.57 | 0.002847942 |
| <i>TMEM132A</i>     | DN | No overlap | -1.55 | 0.004121004 |
| <i>WNK4</i>         | DN | No overlap | -1.80 | 0.004852878 |
| <i>VWA2</i>         | DN | No overlap | -1.18 | 0.005346739 |
| <i>BRIP1</i>        | DN | Overlapped | -0.86 | 0.005546229 |
| <i>CRB3</i>         | DN | No overlap | -0.98 | 0.005546229 |
| <i>GP2</i>          | DN | No overlap | -2.70 | 0.005546229 |
| <i>PCSK4</i>        | DN | No overlap | -1.10 | 0.006846737 |
| <i>PLEKHN1</i>      | DN | No overlap | -1.80 | 0.006846737 |
| <i>SLC26A3</i>      | DN | No overlap | -2.62 | 0.006846737 |
| <i>SOWAHB</i>       | DN | No overlap | -1.53 | 0.007470579 |
| <i>GALNT6</i>       | DN | No overlap | -1.75 | 0.00877626  |

|                     |    |            |       |             |
|---------------------|----|------------|-------|-------------|
| <i>WNT7B</i>        | DN | No overlap | -1.84 | 0.00907245  |
| <i>TMEM63C</i>      | DN | No overlap | -2.41 | 0.009370351 |
| <i>C6</i>           | DN | Overlapped | -1.55 | 0.009857074 |
| <i>NUSAP1</i>       | DN | No overlap | -0.88 | 0.009922929 |
| <i>PROM2</i>        | DN | No overlap | -1.63 | 0.009922929 |
| <i>ALOX15B</i>      | DN | No overlap | -2.64 | 0.009995821 |
| <i>CHIA</i>         | DN | Overlapped | -3.14 | 0.009995821 |
| <i>ESPN</i>         | DN | No overlap | -1.83 | 0.009995821 |
| <i>KIF20A</i>       | DN | Overlapped | -1.40 | 0.009995821 |
| <i>MEF2B</i>        | DN | Overlapped | -1.68 | 0.009995821 |
| <i>SEZ6L2</i>       | DN | No overlap | -1.27 | 0.009995821 |
| <i>FAM83E</i>       | DN | No overlap | -1.65 | 0.010235587 |
| <i>TMEM184A</i>     | DN | No overlap | -1.37 | 0.010235587 |
| <i>ANLN</i>         | DN | No overlap | -1.50 | 0.0106403   |
| <i>BUB1B</i>        | DN | No overlap | -1.62 | 0.0106403   |
| <i>LYPD6</i>        | DN | No overlap | -1.78 | 0.010912143 |
| <i>OPRPN</i>        | DN | No overlap | -3.28 | 0.010912143 |
| <i>C4B</i>          | DN | No overlap | -2.37 | 0.010972408 |
| <i>INPP5J</i>       | DN | No overlap | -1.64 | 0.011452538 |
| <i>KIFC1</i>        | DN | No overlap | -0.94 | 0.011788214 |
| <i>ALB</i>          | DN | No overlap | -1.75 | 0.011995574 |
| <i>LOC110091777</i> | DN | No overlap | -1.24 | 0.011995574 |
| <i>PKIB</i>         | DN | No overlap | -1.57 | 0.013312259 |
| <i>TFAP2B</i>       | DN | No overlap | -2.08 | 0.014003154 |
| <i>ANKRD24</i>      | DN | Overlapped | -0.76 | 0.015883115 |
| <i>CELSR1</i>       | DN | No overlap | -1.43 | 0.015883115 |
| <i>RET</i>          | DN | No overlap | -1.24 | 0.015883115 |
| <i>SYT12</i>        | DN | No overlap | -1.36 | 0.015883115 |
| <i>EPPK1</i>        | DN | No overlap | -1.82 | 0.016568581 |
| <i>LMX1B</i>        | DN | No overlap | -1.52 | 0.016592444 |
| <i>CBLC</i>         | DN | No overlap | -1.86 | 0.017619312 |
| <i>ERVMER34-1</i>   | DN | No overlap | -1.38 | 0.017619312 |
| <i>ERBB2</i>        | DN | No overlap | -1.16 | 0.017686376 |
| <i>AGRN</i>         | DN | No overlap | -1.21 | 0.018307441 |
| <i>CLDN7</i>        | DN | No overlap | -1.26 | 0.018517761 |
| <i>RASSF7</i>       | DN | No overlap | -1.43 | 0.018910076 |
| <i>TFAP2A</i>       | DN | No overlap | -1.83 | 0.01900991  |
| <i>CHST8</i>        | DN | No overlap | -2.31 | 0.019179403 |
| <i>LOC285097</i>    | DN | No overlap | -1.60 | 0.019179403 |
| <i>RASEF</i>        | DN | No overlap | -1.97 | 0.019179403 |
| <i>TC2N</i>         | DN | No overlap | -1.12 | 0.019179403 |
| <i>SORD</i>         | DN | No overlap | -0.93 | 0.019429999 |
| <i>LINC01087</i>    | DN | No overlap | -2.38 | 0.020262138 |
| <i>SLC44A4</i>      | DN | No overlap | -1.80 | 0.020300591 |
| <i>ABAT</i>         | DN | No overlap | -0.65 | 0.020598872 |
| <i>TMEM26</i>       | DN | No overlap | -1.79 | 0.020598872 |
| <i>GXYLT1P3</i>     | DN | No overlap | -2.00 | 0.020952196 |

|                     |    |            |       |             |
|---------------------|----|------------|-------|-------------|
| <i>FOXA1</i>        | DN | No overlap | -2.31 | 0.021135679 |
| <i>NBPF6</i>        | DN | No overlap | -1.85 | 0.021135679 |
| <i>TSPY26P</i>      | DN | Overlapped | -0.91 | 0.021994315 |
| <i>EHD3</i>         | DN | No overlap | -0.73 | 0.022984467 |
| <i>WIPF3</i>        | DN | No overlap | -0.69 | 0.023225823 |
| <i>MAMDC4</i>       | DN | Overlapped | -1.39 | 0.02329485  |
| <i>SBK1</i>         | DN | No overlap | -1.33 | 0.02329485  |
| <i>BIRC5</i>        | DN | No overlap | -1.22 | 0.023494809 |
| <i>SSPOP</i>        | DN | Overlapped | -0.92 | 0.023494809 |
| <i>LYPD3</i>        | DN | No overlap | -1.70 | 0.023771542 |
| <i>MUC5B</i>        | DN | Overlapped | -2.02 | 0.023771542 |
| <i>TROAP</i>        | DN | Overlapped | -1.21 | 0.023771542 |
| <i>CAPN13</i>       | DN | No overlap | -1.96 | 0.023825093 |
| <i>PLA2G4F</i>      | DN | No overlap | -1.33 | 0.024548531 |
| <i>ZNF552</i>       | DN | No overlap | -0.93 | 0.024548531 |
| <i>CDSN</i>         | DN | No overlap | -1.39 | 0.024551553 |
| <i>CELSR2</i>       | DN | No overlap | -1.06 | 0.024620897 |
| <i>TTC36</i>        | DN | Overlapped | -1.23 | 0.024620897 |
| <i>CRACR2B</i>      | DN | No overlap | -1.10 | 0.025187412 |
| <i>CARD14</i>       | DN | No overlap | -1.10 | 0.025361594 |
| <i>SEC14L2</i>      | DN | No overlap | -1.48 | 0.025683373 |
| <i>ALDH3B2</i>      | DN | No overlap | -2.54 | 0.025841092 |
| <i>LOC112268037</i> | DN | No overlap | -1.64 | 0.025841092 |
| <i>MACC1</i>        | DN | No overlap | -1.03 | 0.026055084 |
| <i>TMEM238</i>      | DN | No overlap | -1.57 | 0.026567758 |
| <i>GCK</i>          | DN | Overlapped | -1.20 | 0.026614808 |
| <i>S100P</i>        | DN | No overlap | -1.85 | 0.027116078 |
| <i>CATSPERB</i>     | DN | No overlap | -1.30 | 0.027173205 |
| <i>OBSCN</i>        | DN | Overlapped | -0.88 | 0.027203402 |
| <i>MAP3K9</i>       | DN | No overlap | -1.25 | 0.027366939 |
| <i>PSD3</i>         | DN | No overlap | -0.81 | 0.027366939 |
| <i>PLEKHS1</i>      | DN | Overlapped | -1.89 | 0.028990673 |
| <i>TGFB2</i>        | DN | No overlap | -1.03 | 0.02907288  |
| <i>INO80B</i>       | DN | No overlap | -0.67 | 0.029993641 |
| <i>CYP4F8</i>       | DN | No overlap | -2.15 | 0.030258612 |
| <i>LINC02076</i>    | DN | Overlapped | -0.88 | 0.030426568 |
| <i>ALCAM</i>        | DN | No overlap | -1.32 | 0.030498995 |
| <i>PPP1R14C</i>     | DN | Overlapped | -1.56 | 0.031539567 |
| <i>ELF3</i>         | DN | No overlap | -1.76 | 0.031830723 |
| <i>LLGL2</i>        | DN | No overlap | -0.99 | 0.031858175 |
| <i>HJURP</i>        | DN | No overlap | -0.95 | 0.03209884  |
| <i>KRT80</i>        | DN | Overlapped | -1.87 | 0.032540003 |
| <i>NECTIN1</i>      | DN | No overlap | -0.84 | 0.032915542 |
| <i>GGT1</i>         | DN | No overlap | -1.10 | 0.033741031 |
| <i>MYB</i>          | DN | No overlap | -1.62 | 0.033849256 |
| <i>IRS1</i>         | DN | No overlap | -0.63 | 0.034299023 |
| <i>AZGP1</i>        | DN | No overlap | -0.67 | 0.03467232  |

|                     |    |            |       |             |
|---------------------|----|------------|-------|-------------|
| <i>KRT8</i>         | DN | No overlap | -1.40 | 0.03467232  |
| <i>CDT1</i>         | DN | Overlapped | -1.23 | 0.034830469 |
| <i>CASZ1</i>        | DN | No overlap | -1.02 | 0.03520249  |
| <i>MGAM2</i>        | DN | Overlapped | -1.93 | 0.035220428 |
| <i>PI3</i>          | DN | Overlapped | -1.94 | 0.035220428 |
| <i>SPTBN2</i>       | DN | No overlap | -1.26 | 0.035220428 |
| <i>MYBL2</i>        | DN | Overlapped | -0.88 | 0.035429927 |
| <i>PLCH2</i>        | DN | No overlap | -1.53 | 0.036363136 |
| <i>NR6A1</i>        | DN | No overlap | -0.80 | 0.036463022 |
| <i>SLC27A6</i>      | DN | No overlap | -1.31 | 0.036463022 |
| <i>SYT7</i>         | DN | No overlap | -0.83 | 0.036463022 |
| <i>MCM2</i>         | DN | No overlap | -0.75 | 0.036795424 |
| <i>CYP2G1P</i>      | DN | No overlap | -1.70 | 0.037380271 |
| <i>PLS1</i>         | DN | No overlap | -1.34 | 0.037751557 |
| <i>PKP3</i>         | DN | No overlap | -1.52 | 0.038513017 |
| <i>PARD6B</i>       | DN | No overlap | -0.76 | 0.038762459 |
| <i>CHAD</i>         | DN | No overlap | -1.49 | 0.038860598 |
| <i>KCNC3</i>        | DN | No overlap | -1.08 | 0.039003705 |
| <i>EDN1</i>         | DN | No overlap | -0.73 | 0.039520174 |
| <i>IQCH</i>         | DN | No overlap | -0.83 | 0.03964113  |
| <i>EVPL</i>         | DN | No overlap | -1.33 | 0.040279869 |
| <i>IGFBP2</i>       | DN | No overlap | -1.00 | 0.040569439 |
| <i>SMIM22</i>       | DN | No overlap | -1.67 | 0.040569439 |
| <i>DTL</i>          | DN | No overlap | -1.14 | 0.041142481 |
| <i>LMTK3</i>        | DN | No overlap | -1.44 | 0.041142481 |
| <i>LOC105376436</i> | DN | No overlap | -2.69 | 0.041142481 |
| <i>PTPRT</i>        | DN | No overlap | -1.59 | 0.041142481 |
| <i>SFN</i>          | DN | No overlap | -1.29 | 0.041142481 |
| <i>ST8SIA6</i>      | DN | No overlap | -1.21 | 0.041142481 |
| <i>SYNE4</i>        | DN | No overlap | -1.34 | 0.041142481 |
| <i>ZNF681</i>       | DN | No overlap | -0.60 | 0.041142481 |
| <i>KIF5C</i>        | DN | No overlap | -1.13 | 0.041214607 |
| <i>PNMT</i>         | DN | No overlap | -1.32 | 0.041214607 |
| <i>FAM83H</i>       | DN | No overlap | -1.06 | 0.04198391  |
| <i>RAB27B</i>       | DN | No overlap | -1.31 | 0.042508503 |
| <i>UHRF1</i>        | DN | Overlapped | -1.00 | 0.042508503 |
| <i>HEPACAM2</i>     | DN | No overlap | -2.38 | 0.043185538 |
| <i>TACSTD2</i>      | DN | No overlap | -1.43 | 0.043185538 |
| <i>CLDN3</i>        | DN | No overlap | -1.85 | 0.043359393 |
| <i>VTCN1</i>        | DN | No overlap | -2.04 | 0.044237625 |
| <i>PIANP</i>        | DN | No overlap | -0.77 | 0.044338161 |
| <i>PRR36</i>        | DN | No overlap | -1.60 | 0.044776449 |
| <i>S100A14</i>      | DN | No overlap | -1.69 | 0.044776449 |
| <i>ABCB9</i>        | DN | No overlap | -0.62 | 0.04487779  |
| <i>LRIG1</i>        | DN | Overlapped | -0.73 | 0.04487779  |
| <i>NCCRP1</i>       | DN | No overlap | -1.08 | 0.04489705  |
| <i>GATA3</i>        | DN | No overlap | -1.03 | 0.045439803 |

|                     |    |            |       |             |
|---------------------|----|------------|-------|-------------|
| <i>MYO5B</i>        | DN | No overlap | -1.25 | 0.045654073 |
| <i>CDC45</i>        | DN | No overlap | -1.13 | 0.046002361 |
| <i>MELTF</i>        | DN | No overlap | -0.97 | 0.046002361 |
| <i>RAD54L</i>       | DN | No overlap | -0.95 | 0.046002361 |
| <i>NEK10</i>        | DN | No overlap | -1.48 | 0.046197395 |
| <i>AZGP1P1</i>      | DN | Overlapped | -1.22 | 0.04652077  |
| <i>KRT6B</i>        | DN | No overlap | -1.70 | 0.046652481 |
| <i>RORC</i>         | DN | No overlap | -1.14 | 0.046951076 |
| <i>LZTS1</i>        | DN | No overlap | -0.83 | 0.046983949 |
| <i>CENPF</i>        | DN | No overlap | -0.87 | 0.047792522 |
| <i>ST14</i>         | DN | No overlap | -1.31 | 0.048017337 |
| <i>CACNG4</i>       | DN | No overlap | -1.81 | 0.048030104 |
| <i>LOC105377211</i> | DN | No overlap | -0.72 | 0.048242403 |
| <i>USP43</i>        | DN | No overlap | -1.69 | 0.048242403 |
| <i>DNAJC12</i>      | DN | No overlap | -1.44 | 0.048846258 |
| <i>SLC7A3</i>       | DN | No overlap | -1.52 | 0.049494752 |
| <i>MKI67</i>        | DN | No overlap | -1.12 | 0.049937226 |

---
